# Supplementary material for: Inhibition of Porphyromonas gulae and periodontal disease in dogs by a combination of clindamycin and interferon alpha
Source: PubMed Central journal article supplement (PMC7033253; doi:10.1038/s41598-020-59730-9), 2020-02-20
Supplement: 41598_2020_59730_MOESM1_ESM.pdf [file 41598_2020_59730_MOESM1_ESM.pdf]

**Inhibition of *Porphyromonas gulae* and periodontal diseases in dogs by a combination of clindamycin and interferon alpha**

Ryota Nomura, Hiroaki Inaba, Hidemi Yasuda, Mitsuyuki Shirai, Yukio Kato, Masaru Murakami, Naoki Iwashita, So Shirahata, Sho Yoshida, Saaya Matayoshi, Junya Yasuda, Nobuaki Arai, Fumitoshi Asai, Michiyo Matsumoto-Nakano, Kazuhiko Nakano

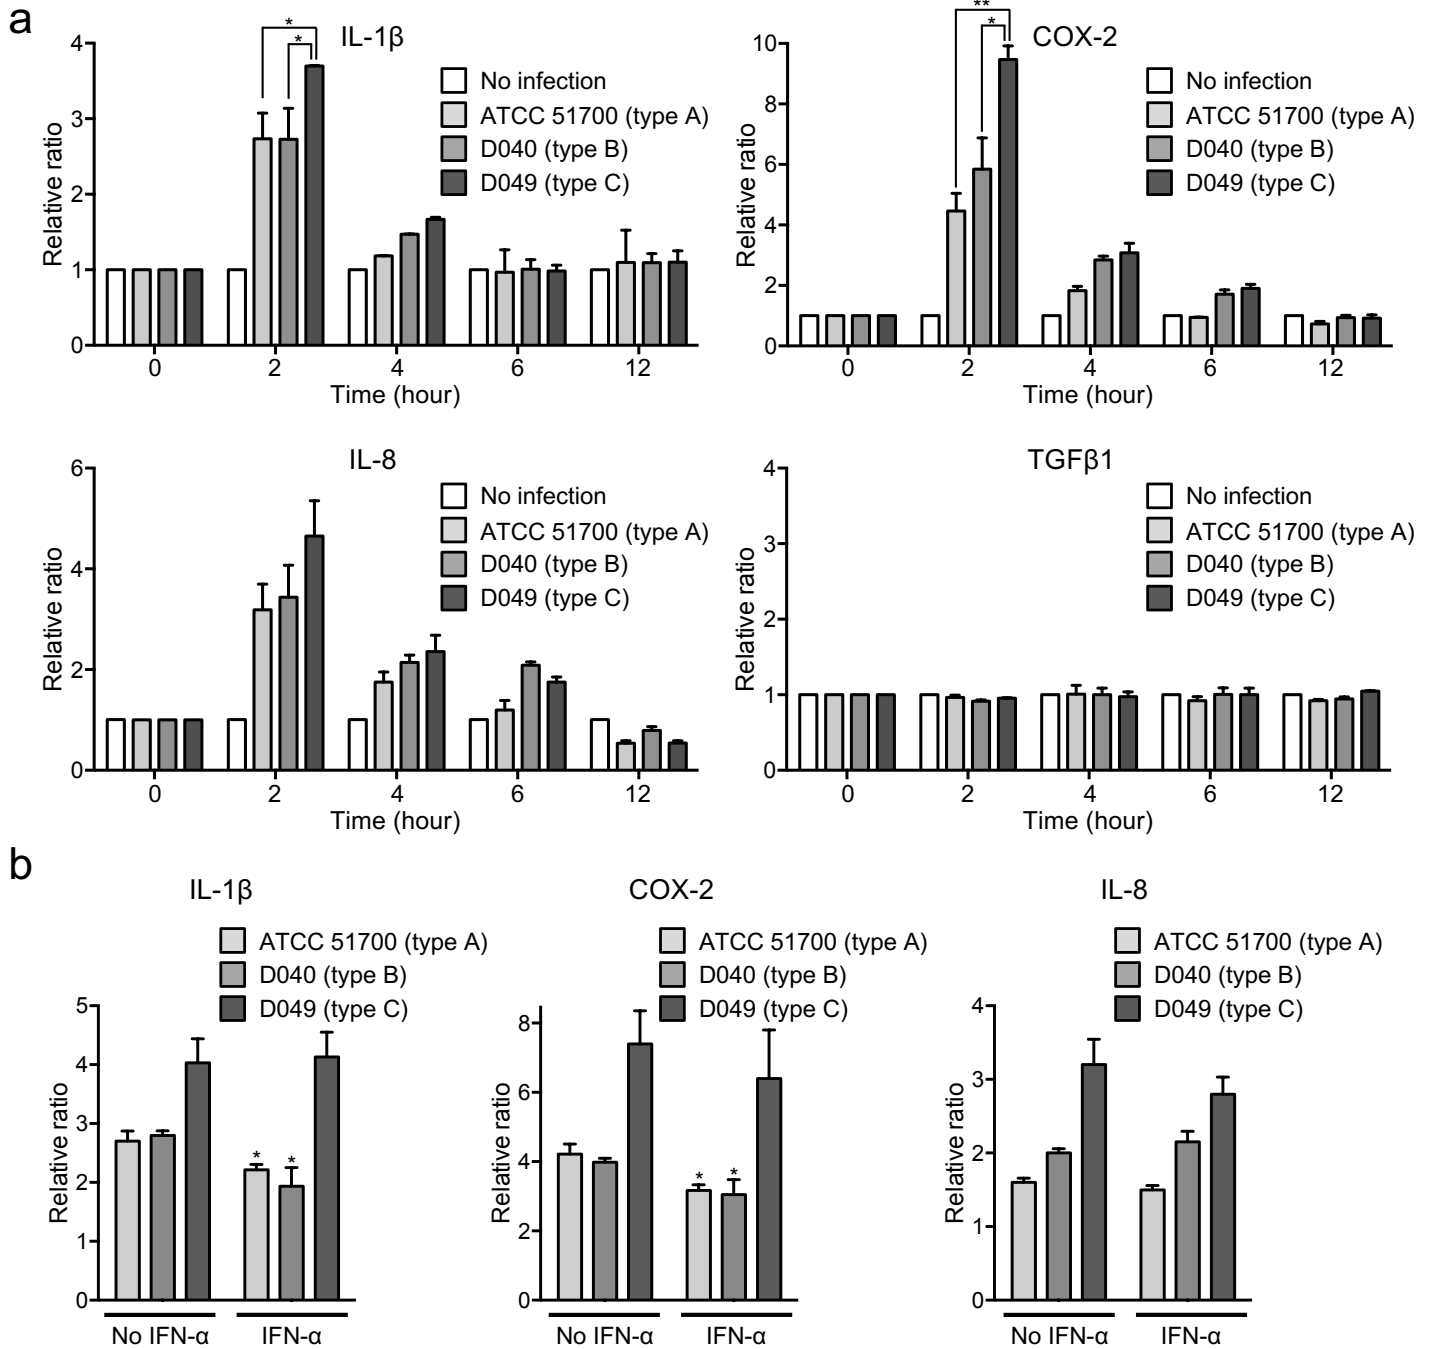

**Supplementary Figure 1** Proinflammatory mRNA expression from Ca9-22 cells infected with *P. gulae* strains. (a) Relative ratio of proinflammatory mRNA expression at multiple time points. Proinflammatory mRNA expression before *P. gulae* infection (0 h) was defined as the baseline. There were significant differences as determined by using analysis of variance with Bonferroni correction ( $*P < 0.05$  and  $**P < 0.01$ ). (b) Relative ratio of mRNA expression in the presence of interferon alpha (IFN- $\alpha$ ) formulation. Proinflammatory mRNA expression before *P. gulae* infection (0 h) was defined as the baseline. There were significant differences, relative to no IFN- $\alpha$  formulation, upon infection with each *P. gulae* strain, as determined by using analysis of variance with Bonferroni correction ( $*P < 0.05$ ).

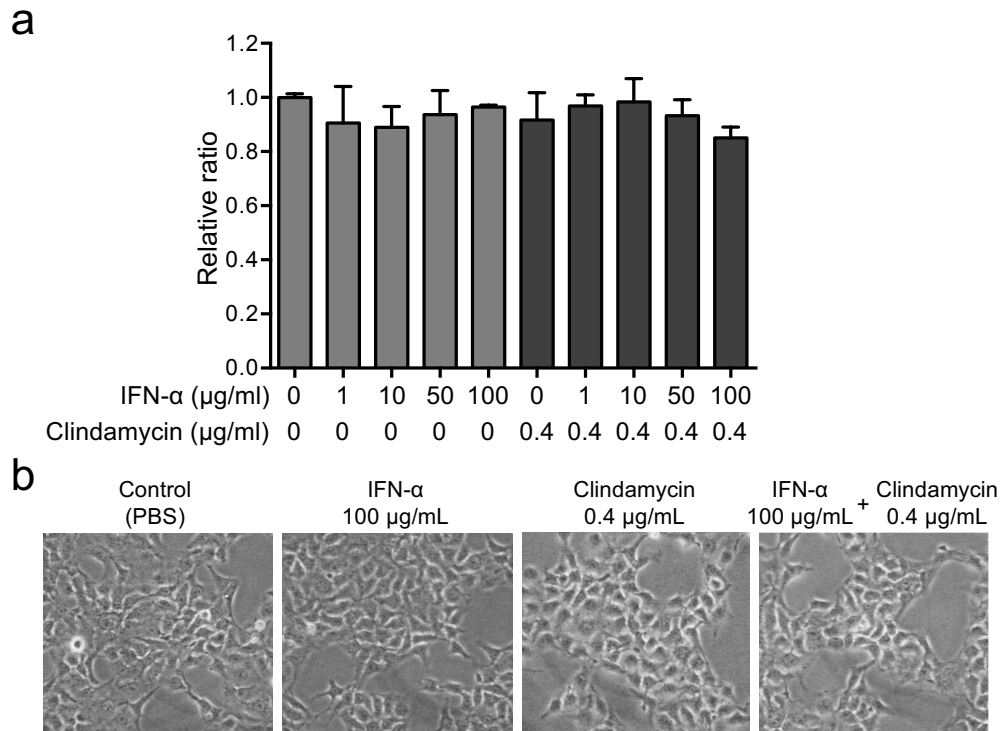

**Supplementary Figure 2.** Effects of IFN- $\alpha$  formulation and clindamycin on Ca9-22 gingival epithelial cells. (a) Relative ratio of cell growth. The gingival epithelial cell growth without IFN- $\alpha$  formulation and clindamycin was defined as the baseline. (b) Representative images of the gingival epithelial cells with or without IFN- $\alpha$  formulation and clindamycin.
